22

## Abstract

23 Togo is a low-income country in West Africa. Estimates suggest that only 25% of the Togolese population  
24 have received at least one dose of any COVID-19 vaccine by June 2023. Whilst the early phase of the  
25 pandemic vaccine rollout across 2021 was dominated by higher-income countries taking much of the  
26 available supply, there have long been sufficient supplies for all nations. Thus, there remains a need to  
27 understand reasons for low uptake in countries such as Togo. Two cross-sectional telephone surveys of  
28 Togo residents were conducted in December 2020 and January 2022. These surveys asked questions around  
29 perceptions of COVID-19, trust in public health messaging, belief in conspiracy theories, and hesitancy  
30 around COVID-19 vaccination. Analyses here focus on unvaccinated respondents. Across Survey 1 (N =  
31 1430) and Survey 2 (N = 212), 65% of respondents were men, 47% lived in Lomé (capital city of Togo),  
32 25% completed higher education, 67% were married, and 69% were Christian. Between Surveys 1 and 2,  
33 overall hesitancy (33.0% to 58.0%) and beliefs in conspiracy theories (29% to 65%) significantly increased.  
34 Using logistics regression, governmental mistrust was the strongest significant predictor of hesitancy (OR:  
35 2.90). Participants who indicated agreement or uncertainty with at least one conspiracy belief also predicted  
36 greater vaccine hesitancy (OR: 1.36). Proactive approaches to public health messaging, that better  
37 understand reasons for hesitancy across different demographics, can support uptake of COVID-19  
38 vaccinations within Togo. This includes health promotion campaigns that use locally and nationally trusted  
39 knowledge providers (e.g. the health service or religious leaders) for greatest effectiveness at reducing  
40 impact of misinformation. Key future research should focus around knowledge gaps and areas of mistrust  
41 created by the pandemic, such as the impact of misinformation upon routine immunisation uptake.

42

43 **Keywords** – vaccine hesitancy; misinformation; infodemic; COVID-19; health promotion

44

## 45 **Introduction**

46 The COVID-19 pandemic, caused by a novel coronavirus which spread across multiple countries in early  
47 2020, was likely responsible for an estimated 18.2m excess global deaths by the end of 2021 (1). The  
48 sustained spread of the virus had a huge impact upon routine health services globally (2), with extensive  
49 and long-lasting socio-economic consequences. Togo is a lower-income country with approximately 8.7m  
50 population in West Africa, bordered by Ghana to the west, Benin to the east, Burkina Faso to the north,  
51 and the Atlantic Ocean to the south. As of June 2023, the country has reported 39,503 confirmed cases of  
52 COVID-19, with 290 confirmed deaths (3). These numbers are likely to be a significant underestimate,  
53 with evidence showing extensive under-reporting from sub-Saharan Africa (SSA) countries amid a likely  
54 higher age-adjusted infection fatality rate (4), and also worsened mortality among hospitalised patients  
55 (5). However, it would still appear that most countries on the African continent did not experience high  
56 overall death rates observed in high-income settings such as the United Kingdom or United States of  
57 America. There are likely to be many contributory factors to the lower mortality in West Africa, including  
58 a younger population, improved preparedness (6), and better outbreak management (7).

59  
60 By mid-2023, there is still a significant global burden of COVID-19, but it is more manageable. Most  
61 countries are looking toward a “post-pandemic” environment, with case management of COVID-19  
62 integrated within routine health systems. However, population-level COVID-19 vaccine uptake remains  
63 low across many lower-income countries, with estimates that only 25% of the Togolese population have  
64 received at least one dose of any COVID-19 vaccine (by June 2023).(3) Whilst the early phase of the  
65 pandemic vaccine rollout across 2021 was dominated by higher-income countries taking much of the  
66 available supply (8), there have long been sufficient supplies for all nations. Thus, there remains a need to  
67 understand reasons for low uptake in countries such as Togo. This can help us to learn lesson from the  
68 COVID-19 pandemic, here developing a deeper understanding of hesitancy and mistrust ahead of any  
69 future similar public health emergency.

70

71 Vaccine hesitancy in West Africa has been associated with governmental dissatisfaction and mistrust,  
72 particularly of government messaging, for example a boycott of the polio vaccine in Northern Nigeria in  
73 2003-2004 (9). More recent surveys administered in (SSA) countries such as Malawi, Mali, and Nigeria,  
74 found that dissatisfaction with the government's response to the COVID-19 pandemic predicted hesitancy  
75 (10). This pattern was also found in Ghana, where supporters of opposition political parties demonstrated  
76 greater hesitancy to receive the COVID-19 vaccine than supporters of the party currently in government  
77 (11). Afrobarometer surveys found that Togolese citizens distrust in their government to ensure the safety  
78 of vaccines has decreased during the pandemic (62% in January 2021 to 47% in March 2022), but were  
79 overall satisfied with the government's handling of the covid-19 crisis (12,13). Thus, individual  
80 differences in political trust and mistrust may be associated with vaccine hesitancy in Togo. Studies have  
81 also shown that COVID-19-related misinformation is common in West Africa. For example, a nationwide  
82 survey conducted in Ghana found that over 50% of citizens believed, or expressed uncertainty, that  
83 COVID-19 was a biological weapon designed by the Chinese government, and that the virus was  
84 designed specifically to reduce or control the population.

85  
86 Previously, our team published two vaccine hesitancy studies in Ghana, one of which took place  
87 electronically across four time points (11), and a one-off survey carried out in-person in a rural location  
88 (14). To date, there has been little COVID-19 research focusing on Togo. This study covers descriptions  
89 of vaccine hesitancy from two national surveys with Togo citizens. A portion of the Survey 1 data has  
90 been made available to policymakers previously for their consideration and decision-making (15). Here,  
91 we provide further insight into both surveys, seeking to identify characteristics associated with vaccine  
92 hesitancy using socioeconomic and demographic variables, and to describe knowledge and attitudes  
93 toward, and the impact of, the COVID-19 pandemic in Togo. To widen access to our results within Togo  
94 and other French-speaking nations, the manuscript is also available in French (S1, translated by author  
95 HA).

96

97 **Methods**

98 **Design, participants, and procedure**

99 Two nationally representative telephone surveys were administered (S2). Survey 1 was conducted across  
100 1-16 December 2020 – approximately 6 months after the first case of COVID-19 was reported in Togo  
101 and prior to any vaccines being available in-country. Survey 2 was implemented across 11-28 January  
102 2022, approximately 9 months after COVID-19 vaccines began to be rolled out in Togo.

103  
104 Prior to data collection, a power analysis was conducted to determine the appropriate sample size. We  
105 assumed a confidence level of 95%, and a margin of error of approximately 3-5%, and found that the  
106 necessary sample was between 385 and 1067 participants in each survey. We achieved these sample sizes  
107 in both surveys. However, when considering just the participants who were unvaccinated in Survey 2, we  
108 fell short of the required number.

109

110 **Ethical approval**

111 See S3 for confirmation of ethics approval. Participants provided verbal informed consent prior to taking  
112 part in the survey. They were provided with verbal participant information during the initial telephone call  
113 and offered written information via email or private message. They were then given time to consider  
114 whether they wished to take part. All participants confirmed that they were over the age of 18 before  
115 proceeding with the survey. The study received ethical approvals from the Togo Bioethics Research  
116 Committee (reference 006/2020/CRBS).

117

118 **Measures**

119 **Vaccine hesitancy.** In Survey 1, participants were asked: “When the COVID-19 vaccine becomes  
120 available to you, would you like to get vaccinated?” (Yes, No, I don’t know). In Survey 2, participants  
121 initially indicated whether they had previously received any doses of the COVID-19 vaccine. Among  
122 participants who indicated that they had not received any doses, participants were subsequently asked:

123 “When the COVID-19 vaccine becomes available to you, would you like to get vaccinated?” (Yes, No, I  
124 don’t know).

125  
126 **Governmental mistrust.** Participants next indicated the extent in which they agreed with the statement:  
127 “I have trust in the Togolese government’s response to the COVID-19 pandemic” (1 = *strongly disagree*;  
128 5 = *strongly agree*;  $M = 3.90$ ;  $SD = 1.11$ ). Mistrust was coded by dichotomising participants’ responses  
129 (strongly disagree, somewhat disagree, or undecided).

130  
131 **Conspiracy beliefs.** Participants indicated whether they believed in eight COVID-19-related conspiracy  
132 beliefs recorded to be circulating in SSA.(11) They selected “yes” if they agreed with the belief, “unsure”  
133 if they were uncertain about the belief, or “no” if they did not agree with the belief (e.g. “To the best of  
134 your knowledge... [COVID-19] is designed to reduce or control the population”).

135  
136 **Sources of information.** Participants were presented with several places where they may have sought out  
137 COVID-19-related information and the pandemic response. These included traditional news sources  
138 (TV/radio), the Ministry of Health and health service, government officials, and the internet (e.g. news  
139 websites, blogs, Google). Participants selected the sources that they typically used to receive information  
140 about COVID-19 and vaccines.

141  
142 **Demographic variables.** Finally, participants indicated their age (coded into <40 and 40>], gender,  
143 religion (Christianity, Muslim, other, none) and marital status (never married, cohabitation without  
144 marriage, married, separated but not divorced, divorced, widow/widower). Socioeconomic variables  
145 covered education (high [university degree or higher] and low [senior secondary or lower]) and region  
146 (Lomé, Maritime, Plateaux, Central, Kara, Savannah).

147  
148 **Data management and analysis**

149 Data were examined for errors, cleaned, and exported into IBM SPSS Statistics 28 for further analysis.  
150 Descriptive statistics summarized respondents' socio-demographics. Inferential statistics were conducted  
151 in three phases. First, temporal trends in hesitancy and population prevalence were compared between  
152 each survey. Hesitancy was coded by dichotomising participants' responses (no, I don't know) to the  
153 question: "When the COVID-19 vaccine becomes available to you, would you like to get vaccinated?"  
154 Chi-Square  $\chi^2$  tests were conducted to assess for categorical differences in hesitancy rates and conspiracy  
155 beliefs between Surveys 1-2. Descriptive analyses were also conducted to summarize conspiracy beliefs  
156 and self-reported sources of vaccine-related information.

157  
158 Bivariate logistic regressions assessed relationships between individual predictors and vaccine hesitancy.  
159 A combined logistic regression considered all the predictors in a single model, providing the strictest test  
160 of potential associations with vaccine hesitancy. Vaccine hesitancy and its associated predictors were  
161 rescaled to 0 or 1, which allowed for direct comparison of effect sizes.

162

## 163 **Results**

### 164 *Participants and socio-demographic characteristics*

165 Table 1 presents descriptive statistics of participants from Survey 1 ( $N = 1430$ ) and Survey 2 ( $N = 212$ ).  
166 The majority of participants across both surveys were men (66.0%) vs. women (34.0%;  $M_{age} = 35.74$ ;  
167  $SD = 12.25$ ;  $Range = 18-84$ ). The majority of participants across surveys lived in Lomé (47.4%) and  
168 Maritime (18.0%). Further, 24.7% completed higher education compared to 75.5% who completed to  
169 senior secondary or lower, and 66.8% reported being married or in a relationship compared to 33.2% who  
170 were not in a relationship. By religion, 69.2% of participants were Christian compared to Muslim or  
171 other/none (16.3% and 14.5%, respectively). Finally, 72.8% reported care responsibilities for under 18s or  
172 older adults.

173

174 **Table 1:** Descriptive statistics of participants from both surveys. Empty cells indicate variables not  
 175 collected.

|                           | <b>Combined<br/>(N = 1642)</b> | <b>2020 (N = 1430)</b> | <b>2022 (N = 212)</b> |
|---------------------------|--------------------------------|------------------------|-----------------------|
|                           | <b>% (n)</b>                   |                        |                       |
| <b>Gender</b>             |                                |                        |                       |
| Men                       | 66.0 (1084)                    | 66.0 (944)             | 66.0 (140)            |
| Women                     | 34.0 (558)                     | 34.0 (486)             | 34.0 (72)             |
| <b>Age</b>                |                                |                        |                       |
| < 40                      | 66.2 (1087)                    | 64.5 (922)             | 77.8 (165)            |
| 40 >                      | 33.8 (555)                     | 35.5 (508)             | 22.2 (47)             |
| <b>Marital status</b>     |                                |                        |                       |
| Single/separated          | 33.2 (544)                     | 31.1 (444)             | 47.2 (100)            |
| Married/in a relationship | 66.8 (1097)                    | 68.9 (985)             | 52.8 (112)            |
| <b>Region</b>             |                                |                        |                       |
| Central                   | 7.9 (129)                      | 7.6 (109)              | 9.4 (20)              |
| Kara                      | 8.3 (136)                      | 8.8 (126)              | 4.7 (10)              |
| Lomé                      | 47.4 (778)                     | 49.2 (704)             | 34.9 (74)             |
| Maritime                  | 18.0 (295)                     | 16.1 (230)             | 30.7 (65)             |
| Plateaux                  | 12.7 (209)                     | 12.3 (176)             | 15.6 (33)             |
| Savannah                  | 5.8 (95)                       | 5.9 (85)               | 4.7 (10)              |



### Highest education

|                           |             |             |            |
|---------------------------|-------------|-------------|------------|
| Senior secondary or lower | 75.5 (1237) | 75.9 (1085) | 71.7 (152) |
| Higher                    | 24.7 (405)  | 24.1 (345)  | 28.3 (60)  |

### Religion

|               |             |            |            |
|---------------|-------------|------------|------------|
| Christian     | 69.2 (1135) | 70.0 (999) | 64.2 (136) |
| Muslim        | 16.3 (267)  | 16.2 (231) | 17.0 (36)  |
| Other or none | 14.5 (237)  | 13.8 (197) | 18.9 (40)  |

### Care responsibilities

|     |             |             |            |
|-----|-------------|-------------|------------|
| No  | 27.2 (446)  | 24.4 (348)  | 46.2 (98)  |
| Yes | 72.8 (1194) | 75.6 (1080) | 53.8 (114) |

### Get vaccinated?

|              |             |            |           |
|--------------|-------------|------------|-----------|
| No           | 26.8 (436)  | 25.7 (368) | 34.2 (68) |
| I don't know | 8.6 (140)   | 6.4 (91)   | 24.1 (48) |
| Yes          | 64.6 (1053) | 67.8 (970) | 41.7 (83) |

### Sources of information

|                       |             |             |            |
|-----------------------|-------------|-------------|------------|
| Mass media (TV/radio) | 94.4 (1550) | 97.4 (1393) | 74.1 (157) |
| THS or health workers | 58.2 (955)  | 63.6 (909)  | 21.7 (46)  |
| Government officials  | 33.4 (549)  | 37.0 (529)  | 9.4 (20)   |
| Internet              | 25.6 (421)  | 26.7 (382)  | 18.4 (39)  |

177

178

179 *Sources of COVID-19 vaccine-related information*

180 The most commonly accessed sources of COVID-19 vaccine-related information were mass media (e.g.  
181 newspapers, radio, TV; 94.4%), the health service (58.2%), government officials (33.4%), and the internet  
182 (e.g. Google, news websites, blogs; 25.6%).

183

184 *Conspiracy beliefs*

185 Overall, 50.9% (554/1088) of participants indicated agreement with at least one conspiracy belief ( $M =$   
186  $0.57$ ,  $SD = 1.03$ ; Table 2). The most commonly believed conspiracy beliefs included: "... is plague  
187 caused by sins and disbelief of human beings" (261/1642; 15.9%), "... a biological weapon designed by  
188 the government of China" (157/1642; 9.6%), and "... designed to reduce or control the population"  
189 (151/1642; 9.2%). A Pearson's Chi-Squared test revealed a significant association between time and  
190 conspiracy beliefs, in which the proportion of respondents who indicated agreement increased from  
191 29.2% (CI: 26.6%-31.8%) in Survey 1 (December 2020) to 64.6% (95% CI: 57.9%-71.3%) in Survey 2  
192 (January 2022;  $\chi^2(1) = 103.85$ ,  $p < .001$ ; Figure 1).

193

194 **Fig 1.** *Breakdown of yes, no, and unsure responses across two nationally representative surveys*  
195 *conducted in Togo in December 2020 and January 2022.*

196

197 **Table 2.** Breakdown of COVID-19 misinformation beliefs in Surveys 2 and 3. *Note:* Percentages may not  
198 equal 100 due to incomplete questions.

---

|  | Combined   | 2020 (N = 1430) | 2022 (N = 212) |
|--|------------|-----------------|----------------|
|  | (N = 1642) |                 |                |

---

|                                                                             | % (n)       |            |            |
|-----------------------------------------------------------------------------|-------------|------------|------------|
| <b>A biological weapon designed by the government of China</b>              |             |            |            |
| Yes                                                                         | 9.6 (157)   | 8.2 (117)  | 18.9 (40)  |
| No                                                                          | 59.0 (969)  | 59.6 (852) | 55.2 (117) |
| I don't know                                                                | 31.4 (515)  | 32.2 (460) | 25.9 (55)  |
| <b>A virus designed by the pharmaceutical companies to sell their drugs</b> |             |            |            |
| Yes                                                                         | 5.4 (89)    | 2.9 (41)   | 22.6 (48)  |
| No                                                                          | 58.0 (951)  | 62.7 (896) | 25.9 (55)  |
| I don't know                                                                | 36.6 (601)  | 34.4 (492) | 51.4 (109) |
| <b>An exaggeration by news media to cause fear and panic</b>                |             |            |            |
| Yes                                                                         | 8.9 (146)   | 7.7 (110)  | 17.0 (36)  |
| No                                                                          | 64.7 (1061) | 68.9 (984) | 36.3 (77)  |
| I don't know                                                                | 26.4 (434)  | 23.4 (335) | 46.7 (99)  |
| <b>A plague caused by sins and disbelief in human beings</b>                |             |            |            |
| Yes                                                                         | 15.9 (261)  | 15.9 (227) | 16.0 (34)  |
| No                                                                          | 61.9 (1016) | 63.4 (907) | 51.4 (109) |

|              |            |            |           |
|--------------|------------|------------|-----------|
| I don't know | 22.5 (365) | 20.7 (296) | 32.5 (69) |
|--------------|------------|------------|-----------|

**Designed to reduce or control the population**

|              |            |            |            |
|--------------|------------|------------|------------|
| Yes          | 9.2 (151)  | 8.3 (118)  | 15.6 (33)  |
| No           | 57.0 (935) | 57.7 (824) | 52.4 (111) |
| I don't know | 33.3 (555) | 34.1 (487) | 32.1 (68)  |

**A biological weapon designed by the US government**

|              |            |            |           |
|--------------|------------|------------|-----------|
| Yes          | 5.6 (92)   | 1.3 (18)   | 34.9 (74) |
| No           | 59.5 (977) | 63.1 (901) | 35.8 (76) |
| I don't know | 34.9 (572) | 35.7 (510) | 29.2 (62) |

**A result of 5G technology being installed in the country**

|              |             |            |            |
|--------------|-------------|------------|------------|
| Yes          | 2.4 (40)    | 1.1 (16)   | 11.3 (24)  |
| No           | 65.5 (1075) | 68.2 (974) | 47.6 (101) |
| I don't know | 32.1 (526)  | 30.7 (439) | 41.0 (87)  |

**Transmitted by radio waves**

|              |             |             |            |
|--------------|-------------|-------------|------------|
| Yes          | 0.5 (8)     | 0.1 (2)     | 2.8 (6)    |
| No           | 74.8 (1227) | 78.1 (1116) | 52.4 (111) |
| I don't know | 24.7 (406)  | 21.8 (311)  | 44.8 (95)  |

199

200

201

202 Next, 48.4% (794/1642) of participants indicated uncertainty about at least one COVID-19-related  
203 conspiracy beliefs ( $M = 2.42$ ,  $SD = 2.99$ ). The most common conspiracy beliefs included: "... a virus  
204 designed by the pharmaceutical industry to sell their drugs" (601/1642; 36.6%), "... is a biological  
205 weapon caused by the US government" (572/1642; 34.9%), and "... designed to reduce or control the  
206 population" (555/1642; 33.8%). A Pearson's Chi-Squared test revealed a significant association between  
207 time and conspiracy beliefs, in which the proportion of respondents increased from 43.5% (CI: 40.9%-  
208 46.1%) in Survey 1 (December 2020) to 81.1% (95% CI: 74.4%-87.8%) in Survey 2 (January 2022;  $\chi^2$   
209 (1) = 104.72,  $p < .001$ ; Figure 1).

210

### 211 *Vaccine hesitancy*

212 A Pearson's Chi-Squared test revealed a significant association (Figure 1) between time and vaccine  
213 hesitancy ( $\chi^2$  (1) = 52.23,  $p < .001$ ), in which overall hesitancy increased from 32.5% (CI: 29.9%-35.1%)  
214 in Survey 1 (December 2020) to 58.0% (95% CI: 51.3%-64.7%) in Survey 2 (January 2022).

215

216

217 Table 3 shows the combined logistic regression model of factors contributing to COVID-19 vaccine  
218 hesitancy. Governmental mistrust was the strongest predictor of hesitancy in the model (OR: 2.90; 95%  
219 CI: 2.23-3.79;  $p < .001$ ) (Figure 1). Further, participants who indicated agreement or uncertainty with at  
220 least one conspiracy belief (i.e., participants who ticked "yes" to indicate agreement or "I don't know" to  
221 indicate uncertainty) predicted greater vaccine hesitancy compared to participants who did not indicate  
222 agreement or uncertainty (OR: 1.36; 95% CI: 1.07-1.72;  $p = .010$ ).

223

224 **Table 3.** Combined logistic regression model of factors contributing to COVID-19 vaccine hesitancy.  $N =$

225 1642.  $R^2 = 0.110$ .

|                                            | <b>OR</b> | <b>p-value</b> | <b>95% CI</b> |
|--------------------------------------------|-----------|----------------|---------------|
| Aged 40+ (ref. = 18-39)                    | 1.097     | .446           | 0.865 – 1.390 |
| Women (ref. = men)                         | 1.225     | .080           | 0.976 – 1.538 |
| Region (ref. = Lomé)                       |           |                |               |
| Central                                    | 0.709     | .118           | 0.461 – 1.091 |
| Kara                                       | 0.582     | .015           | 0.377 – 0.899 |
| Maritime                                   | 1.130     | .416           | 0.842 – 1.516 |
| Plateaux                                   | 0.955     | .788           | 0.681 – 1.339 |
| Savannah                                   | 0.450     | .003           | 0.264 – 0.765 |
| Higher education (ref. = lower)            | 0.866     | .285           | 0.665 – 1.128 |
| Islam faith or other (ref. = Christianity) | 1.333     | .018           | 1.051 – 1.689 |

|                                                            |       |        |               |
|------------------------------------------------------------|-------|--------|---------------|
| Governmental mistrust (ref. = low mistrust)                | 2.904 | < .001 | 2.227 – 3.788 |
| Care responsibilities for adults or children (ref. = none) | 0.880 | .302   | 0.689 – 1.122 |
| Conspiracy beliefs or uncertainty (ref. = none)            | 1.359 | .010   | 1.074 – 1.719 |
| Channels of COVID-19 information                           |       |        |               |
| Mass media (e.g., radio, newspapers, TV)                   | 0.738 | .189   | 0.468 – 1.162 |
| Togo Health Service or health workers                      | 1.145 | .254   | 0.907 – 1.446 |
| Government officials                                       | 0.812 | .095   | 0.636 – 1.037 |
| Internet (e.g., Google, news websites, blogs)              | 1.390 | .016   | 1.063 – 1.818 |

---

226

227

228

229 There were no significant predictors of vaccine hesitancy among participants who used the health service

230 (OR: 1.15; 95% CI: 0.91-1.45;  $p = .25$ ), the mass media (OR: 0.74; 95% CI: 0.47-1.16;  $p = .189$ ), or

231 government officials (OR: 0.81; 95% CI: 0.64-1.04;  $p = .095$ ) for COVID-19 vaccine-related information

232 compared to participants who reported not using these platforms. However, participants who reported

233 using internet webpages (e.g., news websites, blogs, Google) as a source of vaccine-related information

234 were significantly more likely to report vaccine hesitancy than those who did not use the internet (OR:  
235 1.39; 95% CI: 1.06-1.82;  $p = .016$ ).

236  
237 Finally, there were several significant demographic and socio-demographic factors. Greater hesitancy was  
238 observed among Muslim participants compared to Christian participants (OR: 1.33; 95% CI: 1.05-1.69;  $p$   
239 = .018), and significantly lower hesitancy among participants living in the Kara (OR: 0.58; 95% CI: 0.38-  
240 0.90;  $p = .015$ ) and Savannah (OR: 0.45; 95% CI: 0.26-0.76;  $p = .003$ ) regions of Togo compared to  
241 Lomé. There was also marginally higher hesitancy among females compared to male participants (OR:  
242 1.23; 95% CI: 0.97-1.53;  $p = .080$ ) (Figure 2).

243  
244 **Fig 2.** Combined logistic regression model of factors contributing to COVID-19 vaccine hesitancy ( $N =$   
245 1138,  $R^2 = 0.144$ )

246

247

## 248 Discussion

249 This study describes evidence of changes in overall levels of vaccine hesitancy in Togo across two points  
250 in time during the COVID-19 pandemic response. Hesitancy increased between December 2020 and  
251 January 2022. Survey 2 was after COVID-19 vaccines became available in Togo, with the associated  
252 health promotion activity that came with the vaccine roll out. Belief or uncertainty around key conspiracy  
253 theories also increased between surveys 1 and 2. Among key groups more likely to express hesitancy  
254 included Muslims, females, individuals who received COVID-19 information from internet sources, and  
255 individuals who expressed uncertainty about commonly-circulated COVID-19 misinformation beliefs.

256

257 Our results here show that presence of conspiracy theories can have an impact upon public perceptions of  
258 vaccination. There is no 5G technology set up in Togo – despite this, around one-third of participants here



259 indicated they were unsure about whether 5G was responsible for the spread of COVID-19. During the  
260 pandemic, the term ‘infodemic’ was used to describe the prevalence of both too much, and false,  
261 information which resulted in, for example, the WHO African Region setting up an Infodemic Response  
262 Alliance (16). The scope of this Alliance is to monitor and proactively counter misinformation,  
263 conspiracy theories and rumours, thus supporting health service stakeholders with their engagement with  
264 the general public. The monkeypox public health emergency also saw an ‘infodemic’, with significant  
265 quantities of misinformation (17). This can have a negative impact on any health systems response with  
266 individuals feeling stigmatised and reluctant to seek healthcare.

267  
268 Trust in governance has emerged as an important factor around public health messaging and infection  
269 control during the COVID-19 pandemic (18). Our results from Ghana showed that political allegiance has  
270 a role to play in confidence around vaccination (11). Where the government is the source of any health  
271 promotion messaging, this may be more willingly received by populations who voted for them.  
272 Opposition voters may put less trust in that messaging . , Consequently, there should be careful  
273 consideration around who communicates the public health messaging, and how it can have the best  
274 possible impact. Beyond the pandemic, vaccine confidence around routine immunisation will need to be  
275 monitored and new avenues explored around how to counter any misinformation.

276  
277 Within one year of their implementation, the COVID-19 vaccines are estimated to have averted between  
278 15-20m deaths globally (19). For Togo, across 2020 and 2021, there were 248 confirmed deaths.  
279 However, modelling estimates excess death numbers of around 9030, a ratio difference of 36.4 between  
280 confirmed and excess mortality (1). There undoubtedly will be a significant number of COVID-19 deaths  
281 that will never be recognised in official statistics. A lack of infrastructure to collect routine data, including  
282 birth and death registers, mean that many people in lower-income settings, including Togo, never make it  
283 into official statistics (20). Given these limitations, it is very difficult to provide accurate real-time  
284 information during a public health emergency, such as the COVID-19 pandemic. Ahead of the next

285 pandemic or high-profile outbreak, the implementation of improved routine data collection systems would  
286 allow for better-informed policy and planning.

287  
288 One of the strengths of our study is the relatively large number of respondents, and that it covers two time  
289 points, rather than a one-off snapshot of public opinion. These time points also covered pre- and post- the  
290 introduction of the COVID-19 vaccines. However, the need for internet or telephone access may have  
291 limited how representative the sampled population are to some extent. Certain groups will be under-  
292 represented, including those who reside in rural areas and people of lower socio-economic status – the so-  
293 called Last Mile populations (21). There will likely be some response bias, given respondents were  
294 required to consent and take part via random selection from a phone call or have seen the internet survey  
295 and chosen to complete it. However, at the times the survey was completed, there were national  
296 guidelines in place around population movements, and thus remote approaches were more feasible,  
297 locally-acceptable, and more cost effective than in-person data collection around specific communities.  
298 We were also able to gain responses nationally via these methods, which may have been less feasible with  
299 data collectors on the ground.

300

### 301 **Conclusion**

302 Hesitancy rates among unvaccinated individuals in Togo increased between time December 2020 and  
303 January 2022. Among key groups more likely to express hesitancy included those who had a strong  
304 mistrust of government and belief in at least one key conspiracy theory around COVID-19 vaccination.  
305 Health promotion campaigns should use locally and nationally trusted knowledge providers (e.g., the  
306 health service) and distribute the public health messaging via trusted individuals, such as religious  
307 leaders. Messaging should also target media platforms that are used by hesitant population groups. There  
308 needs to be an awareness of the range and strength of the circulating misinformation, with proactive  
309 health promotion approaches to counter the misinformation. For example, campaigns can focus on  
310 addressing concerns about vaccine safety and side effects. These approaches can improve uptake of any

311 COVID-19 vaccines within Togo. Key future research should focus around knowledge gaps created by  
312 the pandemic, such as the impact of misinformation upon routine immunisation uptake.  
313

314 **Acknowledgements**

315 We acknowledge and thank the survey participants and data collectors for their time and assistance with

316 this research.

317

318

319

320

321

322

323

324

325

326

327

328

## References

- 329 1. Wang H, Paulson KR, Pease SA, Watson S, Comfort H, Zheng P, et al. Estimating excess mortality  
330 due to the COVID-19 pandemic: a systematic analysis of COVID-19-related mortality, 2020-21.  
331 Lancet [Internet]. 2022 Jun;399(10334):1513–36. Available from:  
332 <http://www.thelancet.com/article/S0140673621027963/fulltext>
- 333 2. Organization WH. Pulse survey on continuity of essential health services during the COVID-19  
334 pandemic: interim report [Internet]. 2020. Available from:  
335 [https://www.who.int/publications/i/item/WHO-2019-nCoV-EHS\\_continuity-survey-2020.1](https://www.who.int/publications/i/item/WHO-2019-nCoV-EHS_continuity-survey-2020.1)
- 336 3. Our World in Data. Togo: Coronavirus Pandemic Country Profile [Internet]. [cited 2023 Jun 29].  
337 Available from: <https://ourworldindata.org/coronavirus/country/togo>
- 338 4. Levin AT, Owusu-Boaitey N, Pugh S, Fosdick BK, Zwi AB, Malani A, et al. Assessing the burden of  
339 COVID-19 in developing countries: systematic review, meta-analysis and public policy  
340 implications. *BMJ Glob Health* [Internet]. 2022;7(5). Available from:  
341 <https://gh.bmj.com/content/7/5/e008477>
- 342 5. Kirenga BJ, Byakika-Kibwika P. Excess COVID-19 mortality among critically ill patients in Africa.  
343 *The Lancet* [Internet]. 2021 Jun;397(10288):1860–1. Available from:  
344 <https://linkinghub.elsevier.com/retrieve/pii/S0140673621005766>
- 345 6. Ahanhanzo C, Johnson EAK, Eboreime EA, Issiaka S, Traoré BI, Adohinzin CCY, et al. COVID-19 in  
346 West Africa: Regional resource mobilisation and allocation in the first year of the pandemic. *BMJ*  
347 *Glob Health* [Internet]. 2021 May 4 [cited 2021 Jun 10];6(5):4762. Available from:  
348 <http://gh.bmj.com/>
- 349 7. Danquah EPB, Darko S, Frimpong A, Head MG, Osei B. Lessons from the field: COVID-19 outbreak  
350 investigations in Kpone-Katamanso, Greater Accra, Ghana: A Global South approach to disease  
351 control and contact tracing. *Trans R Soc Trop Med Hyg*. 2022;116(10).
- 352 8. Yamey G. Rich countries should tithe their vaccines. *Nature*. 2021 Feb 1;590(7847):529.
- 353 9. Jegede AS. What Led to the Nigerian Boycott of the Polio Vaccination Campaign? *PLoS Med*  
354 [Internet]. 2007 Mar [cited 2023 Jul 24];4(3):e73. Available from:  
355 <https://journals.plos.org/plosmedicine/article?id=10.1371/journal.pmed.0040073>
- 356 10. Kanyanda S, Markhof Y, Wollburg P, Zezza A. Acceptance of COVID-19 vaccines in sub-Saharan  
357 Africa: evidence from six national phone surveys. *BMJ Open* [Internet]. 2021 Jun;11(12):e055159.  
358 Available from: <https://bmjopen.bmj.com/content/11/12/e055159>
- 359 11. Brackstone K, Atengble K, Head M, Boateng L. COVID-19 vaccine hesitancy trends in Ghana: a  
360 cross-sectional study exploring the roles of political allegiance, misinformation beliefs, and  
361 sociodemographic factors. *Pan Afr Med J*. 2022;43.

- 362 12. Afrobarometer. Résumé des résultats Compilé par Center for Research and Opinion Polls (CROP)  
363 [Internet]. 2022 [cited 2023 Aug 1]. Available from: [www.afrobarometer.org](http://www.afrobarometer.org)
- 364 13. Afrobarometer. La COVID-19 au Togo: Les citoyens sont satisfaits de la réponse du gouvernement  
365 mais sceptiques quant aux vaccins [Internet]. 2021 [cited 2023 Aug 1]. Available from:  
366 [https://www.afrobarometer.org/wp-content/uploads/2022/02/ad429-](https://www.afrobarometer.org/wp-content/uploads/2022/02/ad429-togolais_satisfaits_de_la_reponse_du_gouvernement_a_la_covid-19-depeche_afrobarometer-2mars21.pdf)  
367 [togolais\\_satisfaits\\_de\\_la\\_reponse\\_du\\_gouvernement\\_a\\_la\\_covid-19-depeche\\_afrobarometer-](https://www.afrobarometer.org/wp-content/uploads/2022/02/ad429-togolais_satisfaits_de_la_reponse_du_gouvernement_a_la_covid-19-depeche_afrobarometer-2mars21.pdf)  
368 [2mars21.pdf](https://www.afrobarometer.org/wp-content/uploads/2022/02/ad429-togolais_satisfaits_de_la_reponse_du_gouvernement_a_la_covid-19-depeche_afrobarometer-2mars21.pdf)
- 369 14. Afreh OK, Angwaawie P, Attivor EJK, Boateng LA, Brackstone K, Head MG, et al. Examining  
370 confidence and hesitancy towards COVID-19 vaccines: A cross-sectional survey using in-person  
371 data collection in rural Ghana. *Vaccine*. 2023;41(13).
- 372 15. Head M, Brackstone K, Akinochi H, Atengble K, Boateng LA, osei kingsley, et al. Examining  
373 determinants of COVID-19 vaccine hesitancy in Togo. 2021 Jun 25 [cited 2023 Jun 29]; Available  
374 from: [/articles/journal\\_contribution/Examining\\_determinants\\_of\\_COVID-](https://www.afrobarometer.org/wp-content/uploads/2022/02/ad429-togolais_satisfaits_de_la_reponse_du_gouvernement_a_la_covid-19-depeche_afrobarometer-2mars21.pdf)  
375 [19\\_vaccine\\_hesitancy\\_in\\_Togo/14805765/1](https://www.afrobarometer.org/wp-content/uploads/2022/02/ad429-togolais_satisfaits_de_la_reponse_du_gouvernement_a_la_covid-19-depeche_afrobarometer-2mars21.pdf)
- 376 16. World Health Organization. Africa Infodemic Response Alliance [Internet]. [cited 2023 Jul 14].  
377 Available from: <https://www.afro.who.int/aira>
- 378 17. Farahat RA, Head MG, Tharwat S, Alabdallat Y, Essar MY, Abdelazeem B, et al. Infodemic and the  
379 fear of monkeypox: call for action. *Trop Med Health*. 2022;50(1).
- 380 18. Thornton J. Covid-19: Trust in government and other people linked with lower infection rate and  
381 higher vaccination uptake. *BMJ* [Internet]. 2022 Feb 2 [cited 2023 Jul 14];376:o292. Available  
382 from: <https://www.bmj.com/content/376/bmj.o292>
- 383 19. Watson OJ, Barnsley G, Toor J, Hogan AB, Winskill P, Ghani AC. Global impact of the first year of  
384 COVID-19 vaccination: a mathematical modelling study. *Lancet Infect Dis* [Internet]. 2022  
385 Jun;0(0). Available from: <http://www.thelancet.com/article/S1473309922003206/fulltext>
- 386 20. Hoxha K, Hung YW, Irwin BR, Grépin KA. Understanding the challenges associated with the use of  
387 data from routine health information systems in low- and middle-income countries: A systematic  
388 review. *Health Information Management Journal* [Internet]. 2022 Sep 1 [cited 2023 Jun  
389 29];51(3):135–48. Available from:  
390 <https://journals.sagepub.com/doi/10.1177/1833358320928729>
- 391 21. Pedrajas M, Choritz S. Getting to the Last Mile in Least Developed Countries [Internet]. 2016.  
392 Available from: [https://www.unCDF.org/article/939/getting-to-the-last-mile-in-least-developed-](https://www.unCDF.org/article/939/getting-to-the-last-mile-in-least-developed-countries-migration)  
393 [countries-migration](https://www.unCDF.org/article/939/getting-to-the-last-mile-in-least-developed-countries-migration)
- 394
- 395

396

397 **Supporting information**

398 S1. French translation of the submission manuscript

399 S2. Survey questions answered by the participants

400 S3. Ethical approval granted by the Togo Bioethics Research Committee

401

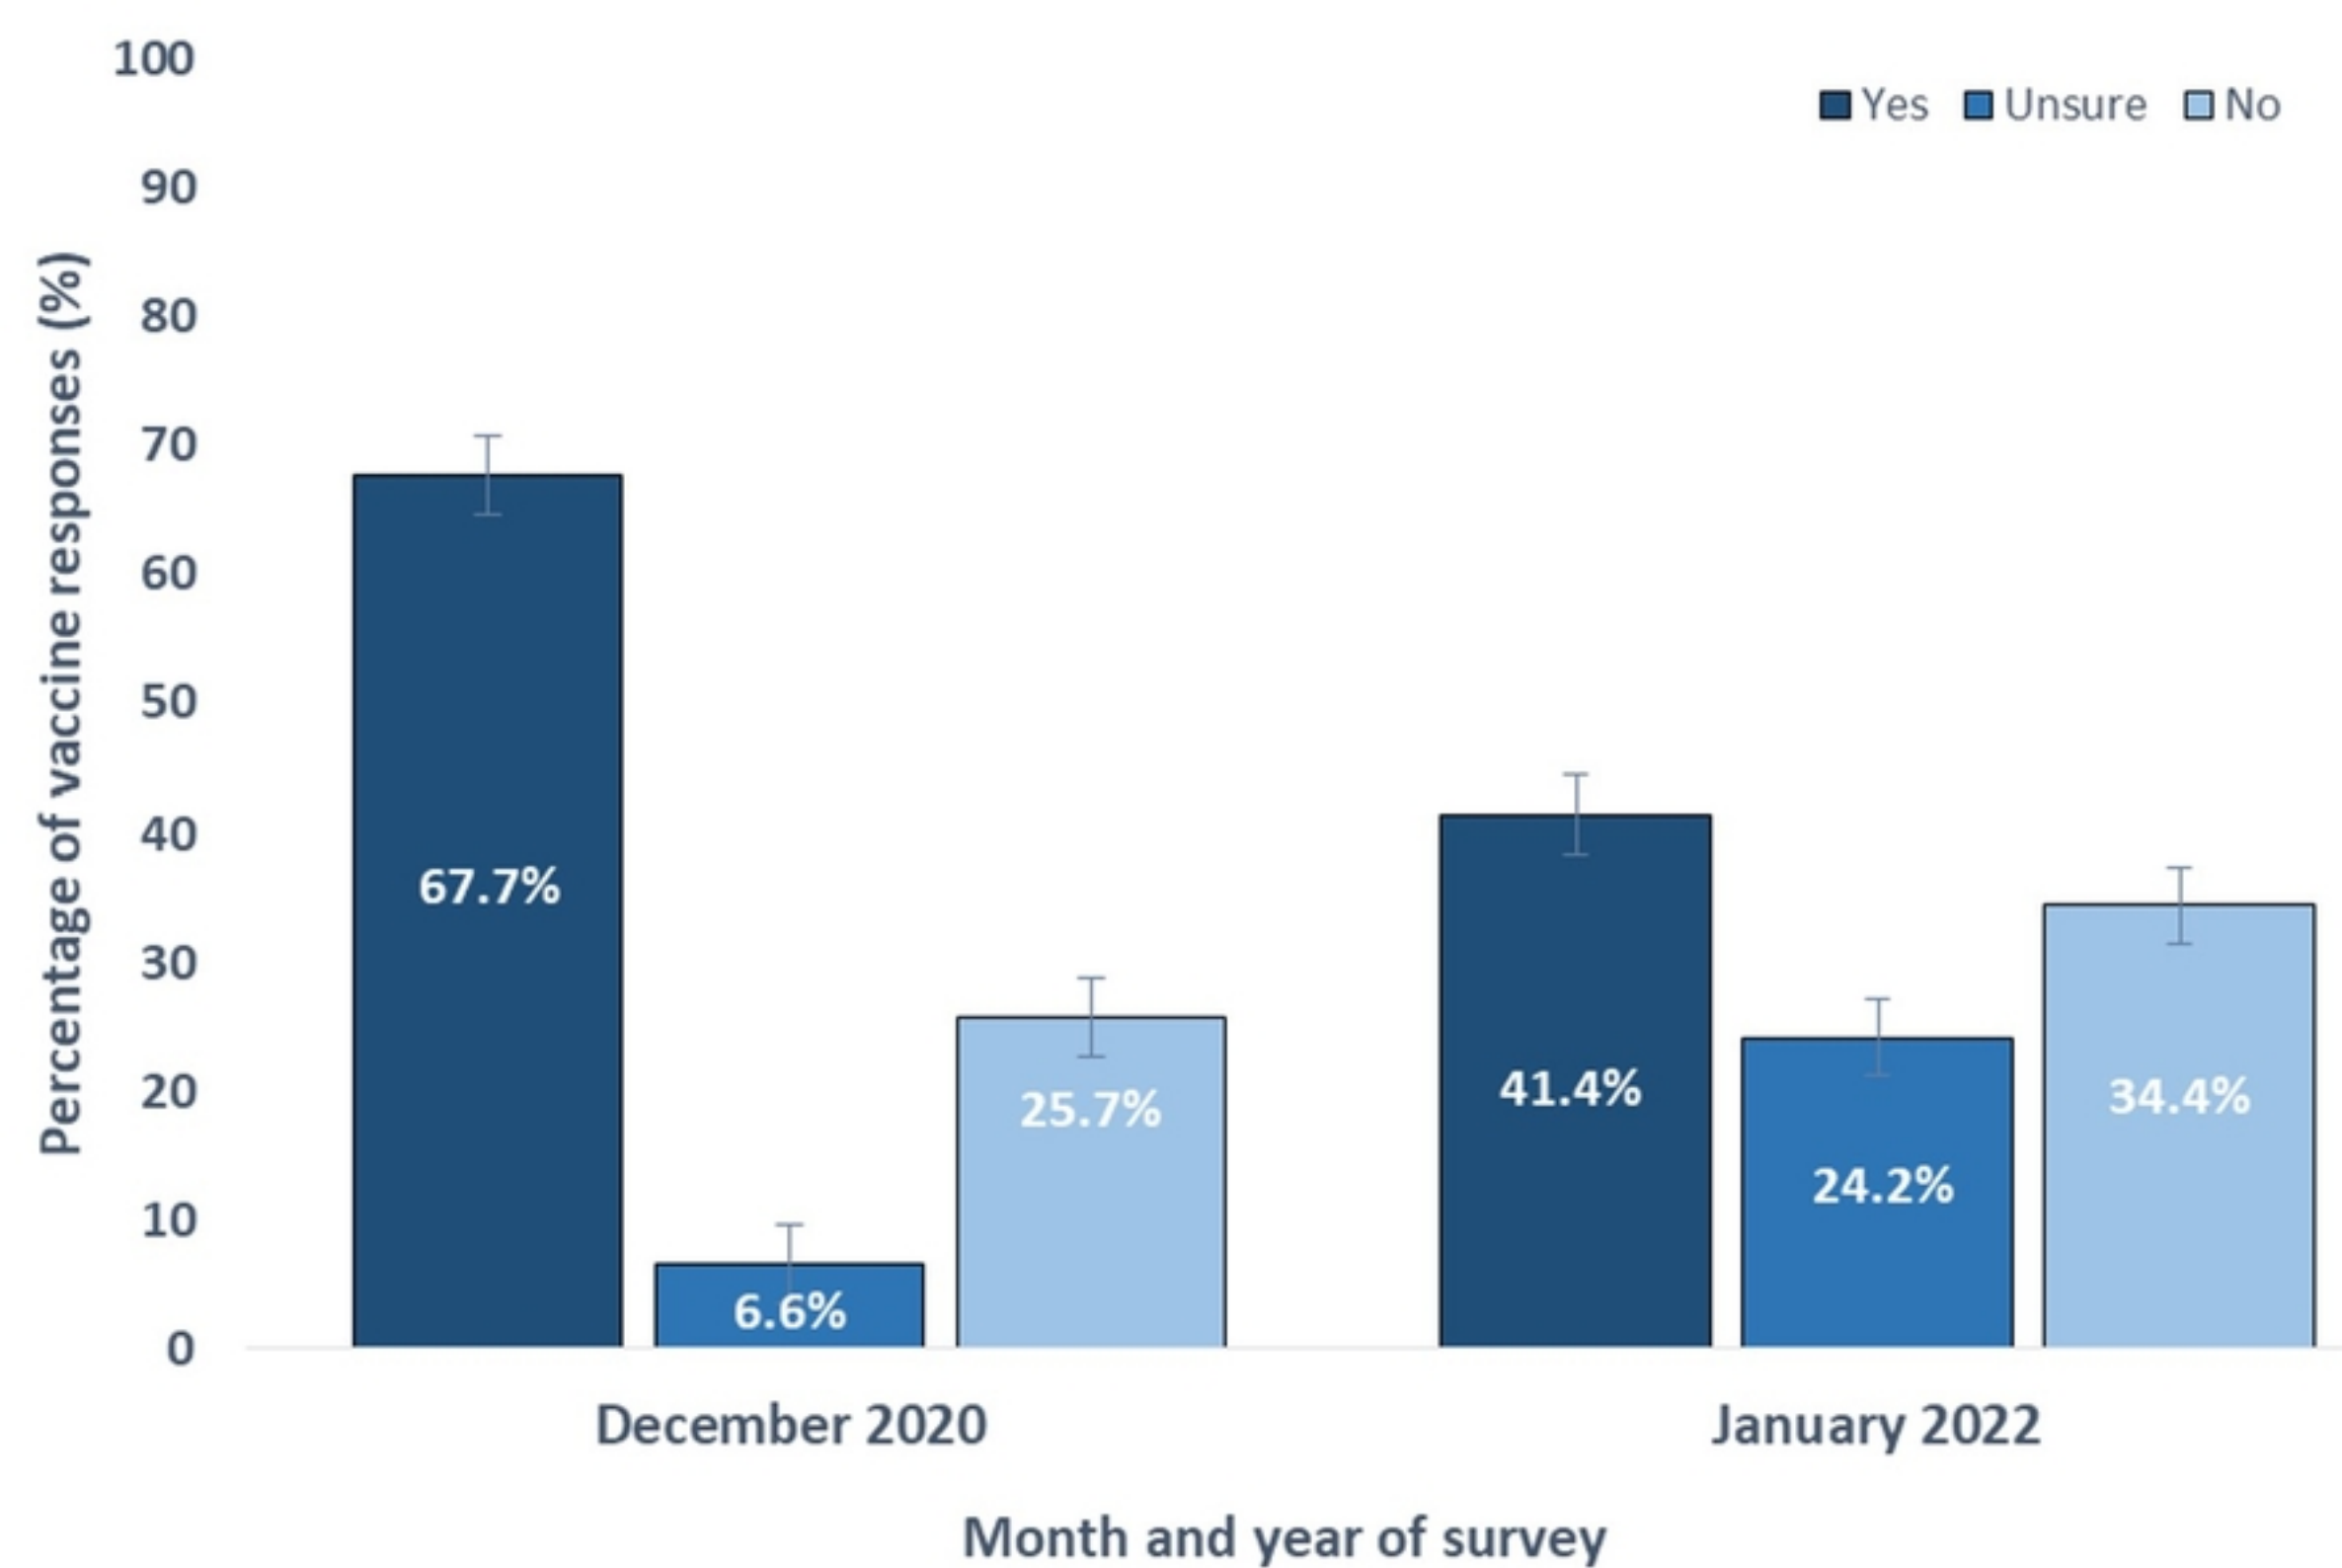

Figure 1



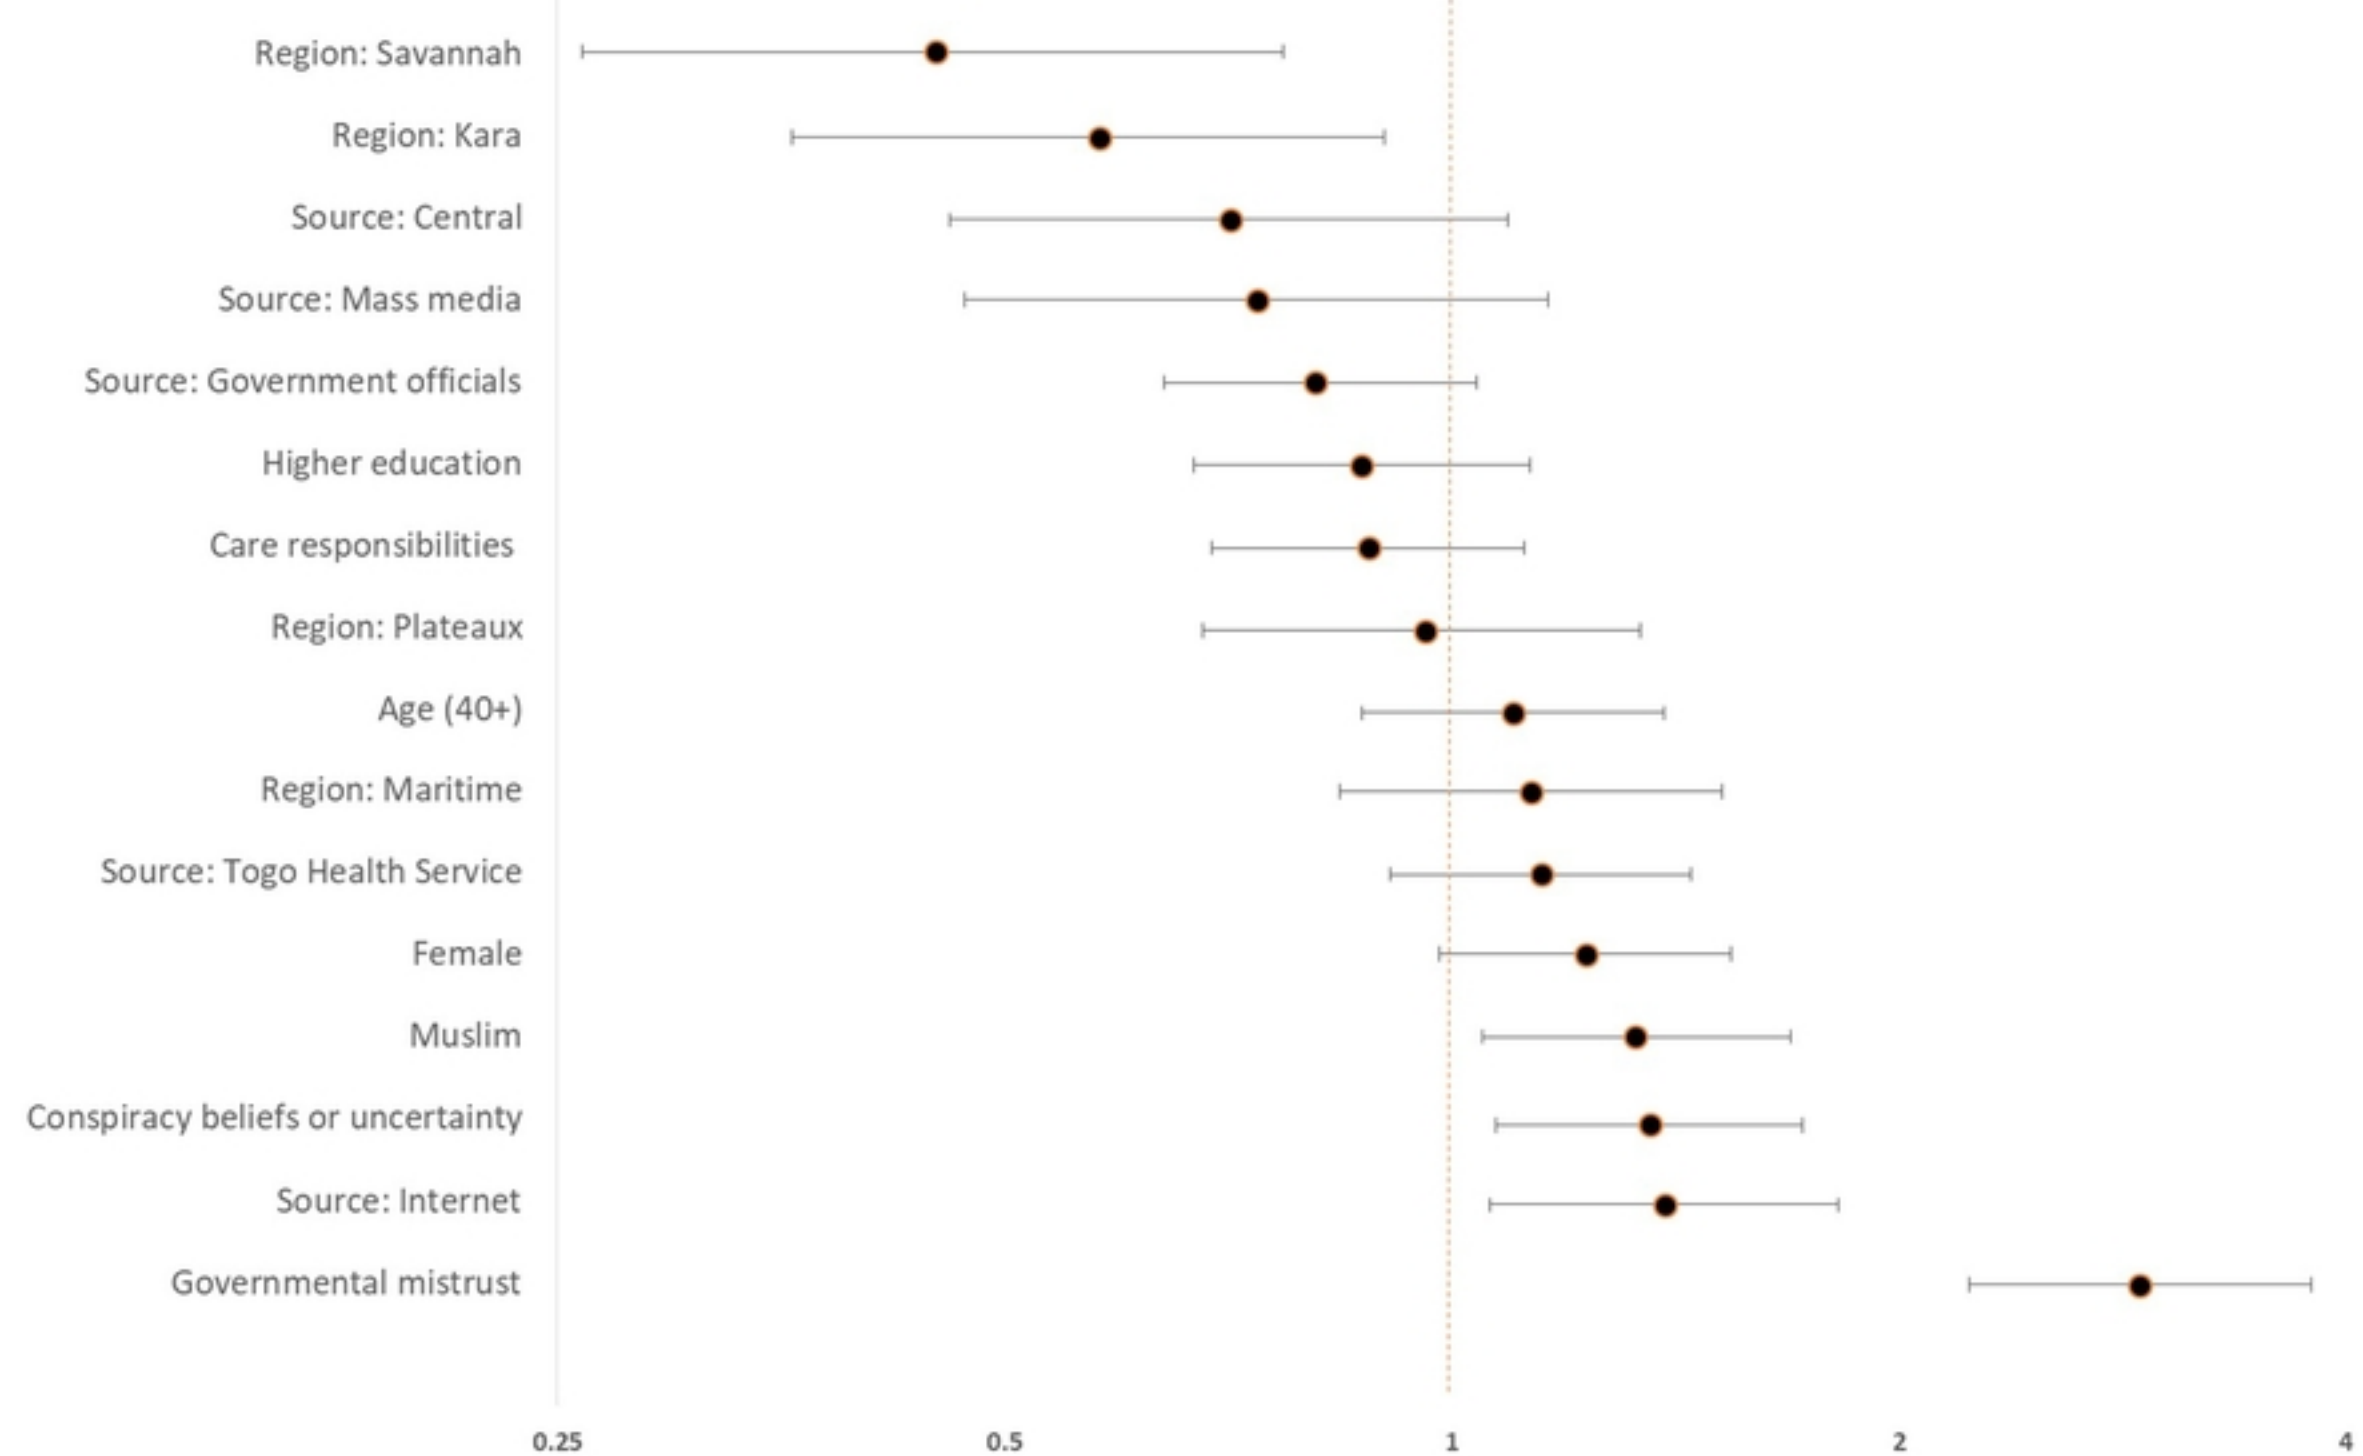

Figure 2
